# Supplementary material for: TheraMind: A Multi-LLM Agent for Accelerating Drug Repurposing in Lung Cancer via Case Report Mining
Source: Research Square preprint supplement (doi:10.21203/rs.3.rs-6787930/v1), 2025-07-01
Supplement: Supplementary file 1 [file ed2b61b796538daec7ac902e.pdf]

---

**Algorithm 1: Generate Responses with Multi-Model Few-Shot Reasoning**

---

**Input :**

- Record set  $\mathcal{R} = \{\rho^{(1)}, \rho^{(2)}, \dots, \rho^{(N)}\}$ , where each record  $\rho^{(i)}$  has:
  - Drug name  $d^{(i)}$
  - URL  $u^{(i)}$
- Prompt set  $\mathcal{Q} = \{q^{(1)}, q^{(2)}, \dots, q^{(L)}\}$
- Few-Shot Examples  $\mathcal{E} = \{(q^{(j)}, a^{(j)})\}$  (at least 2 examples)
- AI Model Endpoints  $\mathcal{M} = \{M_1, M_2, \dots, M_k\}$

**Output:** Structured answers  $\hat{y}(j, i)_k$  and justifications  $\hat{J}(j, i)_k$  for each  $q^{(j)}$  by each model  $M_k$ , associated with  $d^{(i)}$  and  $u^{(i)}$ .

**1 Initialization:**

1. Setup logging; load  $\mathcal{Q}$ .
2. Set  $U_{processed} \leftarrow \emptyset$ .

**Process Records:**

**foreach**  $\rho^{(i)} \in \mathcal{R}$  **do**

    Extract  $\{d^{(i)}, u^{(i)}\}$ .

**if**  $u^{(i)} \in U_{processed}$  **then**

**continue**

    Retrieve  $T_{report}$  from  $u^{(i)}$

    Retrieve  $T_{abstract}$  from  $u^{(i)}$  Form context:

$$C(i) \leftarrow \mathcal{E} \parallel T_{report} \parallel T_{abstract}$$

**Query Models:**

**foreach**  $q^{(j)} \in \mathcal{Q}$  **do**

**foreach**  $M_k \in \mathcal{M}$  **do**

        Submit  $(C(i), q^{(j)})$  to  $M_k$ ; let  $\tilde{a}(j, i)_k$  be the raw response.

        Parse  $\tilde{a}(j, i)_k$  to extract:

$$\hat{y}(j, i)_k \quad \text{and} \quad \hat{J}(j, i)_k$$

**Store & Update:**

    Save  $\hat{y}(j, i)_k$  and  $\hat{J}(j, i)_k$  with  $\{d^{(i)}, u^{(i)}\}$ .

    Update  $U_{processed} \leftarrow U_{processed} \cup \{u^{(i)}\}$ .

**Post-Processing:**

1. Validate consistency across:

$$\hat{y}(j, i)_1, \hat{y}(j, i)_2, \dots, \hat{y}(j, i)_k$$

2. Flag discrepancies if any.

**Finalize:**

Finalize logs, close files, and output the dataset.

---

---

**Algorithm 2: Decision Tree Classification**

---

**Input :** Directory  $D$  of CSV files. Each file  $F \in D$  contains columns  
{NSCLC\_Diagnosed, NSCLC\_Treatment, Drug\_Discontinued, Outcome\_Favourable}  
(optionally Link).

[1mm] Expected pattern:  $P = (\text{yes}, \text{yes}, \text{no}, \text{yes})$ .

**Output:** For each  $F \in D$ , a filtered CSV file  $F_{rel}$  containing rows  $r$  such that  
 $(\ell(r[\text{NSCLC\_Diagnosed}]), \ell(r[\text{NSCLC\_Treatment}]), \ell(r[\text{Drug\_Discontinued}]), \ell(r[\text{Outcome\_Favourable}])) = P$   
with  $\ell(x)$  denoting the lowercase, trimmed form of  $x$ .

1 **Algorithm:**

2 **1. Initialization:**

3  $\forall F \in D, R_F \leftarrow \emptyset$ .

4 **2. For each CSV file  $F \in D$  with extension .csv:**

5 Set the file path:  $path \leftarrow \text{join}(D, F)$ .

6 Load the data:  $df \leftarrow \text{read\_csv}(path, \text{header} = 0)$ .

7 **3. For each row  $r \in df$ :**

8 Define

$$\vec{v}(r) \left( \ell(r[\text{NSCLC\_Diagnosed}]), \ell(r[\text{NSCLC\_Treatment}]), \ell(r[\text{Drug\_Discontinued}]), \ell(r[\text{Outcome\_Favourable}])) \right).$$

if  $\vec{v}(r) = P$  then

9  $R_F \leftarrow R_F \cup \{r\}$ .

10 **4. Output:**

11 if  $R_F \neq \emptyset$  then

12 Write  $R_F$  to a new CSV file  $F_{rel}$  (e.g.,  $F_{relevant\_links.csv}$ ).

13 else

14 Log that no relevant rows were found for  $F$ .

15 **5. Termination:**

16 Process all  $F \in D$  and terminate.

---

---

**Algorithm 3: Individual Model Classifier**

---

**Input :**

- **Link List:**  $\mathcal{L} = \{\ell_1, \ell_2, \dots, \ell_N\}$
- **LLM Responses:** For each  $\ell \in \mathcal{L}$ , preliminary response  $r_{LLM}^{(1)}(\ell)$  (NSCLC mention) and additional responses  $R(\ell)$ .
- **LLM Endpoint Credentials:** Access credentials or API keys.
- **Prompts/Context:**  $\mathcal{P}$  (original question set or context).

**Output:** Relevance Classification for each  $\ell \in \mathcal{L}$  where

$$Label(\ell) \in \{Relevant, NotRelevant\}$$

along with  $R(\ell)$  and final validation response  $f(\ell)$ .

1 **Initialization:**

1. Initialize data structure  $\mathcal{R} : \ell \mapsto R(\ell)$ ; set up logging.

**Collect Responses:**

**foreach**  $\ell \in \mathcal{L}$  **do**

└ Retrieve  $r_{LLM}^{(1)}(\ell)$  and store all responses  $R(\ell)$ .

**Initial Check:**

**foreach**  $\ell \in \mathcal{L}$  **do**

└ **if**  $r_{LLM}^{(1)}(\ell)$  *does not contain* “yes” **then**

└└  $Label(\ell) \leftarrow NotRelevant$

└└ **continue**

**Concatenate:**

**foreach**  $\ell \in \mathcal{L}$  *that passed* **do**

└ Form prompt:

$T(\ell) \leftarrow (R(\ell) \parallel \mathcal{P})$

**Final Validation:**

**foreach**  $\ell \in \mathcal{L}$  *with*  $T(\ell)$  **do**

└ Submit  $T(\ell)$  to LLM; obtain  $f(\ell)$ .

**Classification:**

**foreach**  $\ell \in \mathcal{L}$  **do**

└  $Label(\ell) \leftarrow f(\ell)$

**Output:**

Record  $Label(\ell)$ ,  $R(\ell)$ , and  $f(\ell)$  in structured format.

---

---

**Algorithm 4: Majority Vote Ensemble**

---

**Input :**

- **Base Folder**  $B$  containing subfolders  $\mathcal{F} = \{F_1, F_2, \dots, F_L\}$  with CSV files (each with a **Link** column).
- **Model Prefixes**  $\mathcal{P} = \{p_1, p_2, \dots, p_n\}$  for locating CSV files.
- **Minimum Occurrences**  $m \in N$  (default:  $m = 2$ ).
- Pre-processed CSVs via LLM-based Classification (only relevant links present).

**Output:** For each  $p \in \mathcal{P}$ , a CSV file listing links  $\ell$  that satisfy

$$\mathcal{O}(\ell) \geq m,$$

with:

- $\mathcal{M}(\ell)$ : set of models flagging  $\ell$ ,
- $\mathcal{O}(\ell)$ : total occurrence count.

**1 Initialization:**

1. Setup logging; define subfolders  $\mathcal{F}$  and map each  $F \in \mathcal{F}$  to its model.

**foreach**  $p \in \mathcal{P}$  **do**

**Initialize:** For each link  $\ell$ , set  $\mathcal{O}(\ell) = 0$  and  $\mathcal{M}(\ell) = \emptyset$ .

**foreach**  $F \in \mathcal{F}$  **do**

        Locate CSV files in  $F$  with filename prefix  $p$ .

**foreach** *CSV file* **do**

            Read file; for each row extract link  $\ell$  from the **Link** column.

**if**  $\ell \notin \mathcal{O}$  **then**

                Set  $\mathcal{O}(\ell) \leftarrow 1$  and  $\mathcal{M}(\ell) \leftarrow \{\text{modelcorrespondingto}F\}$ .

**else**

                Update  $\mathcal{O}(\ell) \leftarrow \mathcal{O}(\ell) + 1$  and add the model to  $\mathcal{M}(\ell)$ .

**Aggregate:**

    Define the set of qualifying links:

$$\mathcal{L} = \{\ell \mid \mathcal{O}(\ell) \geq m\}.$$

**Output:**

    Create a CSV file with columns: **Link**, **Models** ( $\mathcal{M}(\ell)$ ), and **Count** ( $\mathcal{O}(\ell)$ ); log the number of aggregated links for prefix  $p$ .

**Finalize:**

1. Repeat for each  $p \in \mathcal{P}$ ; finalize logs and close files.
-
