# Supplementary material for: TheraMind: A Multi-LLM Agent for Accelerating Drug Repurposing in Lung Cancer via Case Report Mining
Source: Research Square preprint supplement (doi:10.21203/rs.3.rs-6787930/v1), 2025-07-01
Supplement: Supplementary file 1 [file fdee94d2ac93f5a3d704c3f3.xlsx]

## Sheet: Updated_True_positives_filtered
Number	URL	Case Report state	Patient Demographics	Condition treated	Treatment	Outcome	Notes
1	https://pubmed.ncbi.nlm.nih.gov/8414933/	Full article is in Japanese, abstract only	1 patient, Patient not specified	Hilar Lung Adenocarcinoma	superselective bronchial arterial infusion therapy with cisplatin and epirubicin hydrochloride, mitomycin C-iohexol-Lipiodol emulsion (EMILE) using Tracker -18 infusion catheter	tumor size reduced
2	https://pubmed.ncbi.nlm.nih.gov/3036992/	abstract only	1 patient, Patient not specified	Inoperable large cell lung carcinoma	combination chemotherapy	5 year survival of patient
3	https://pubmed.ncbi.nlm.nih.gov/2393312/	Full article is in Japanese, abstract only	1 patient, 61 yo male	brain metastasis 6 months after the lung resection for adenocarcinoma	EAP (Etoposide, ADR, CDDP)	complete disappearance of metastases	Treated for the brain mestasis, not the cancer itself
4	https://pubmed.ncbi.nlm.nih.gov/7574764/	Full article is in Japanese, abstract only	6 patients	advanced liver metastases from lung cancer (both SCLC and NSCLC)	intra-arterial infusion chemotherapy employing totally implantable vascular access with 5-FU/CDDP/EPIR/MMC/etoposide in various combinations	effective on the liver metastases	Treated for the lung mestasis, not the cancer itself
5	https://pubmed.ncbi.nlm.nih.gov/17098326/	abstract only	4 patients	advanced NSCLC who were unable to receive systemic chemotherapy or radiotherapy	Arterial infusion chemotherapy	partial response
6	https://pubmed.ncbi.nlm.nih.gov/9505221/	abstract only	3 patients	localized Stage I & 2 (resectable) NSCLC	neoadjuvant chemotherapy	decreases in tumor sizes
7	https://pubmed.ncbi.nlm.nih.gov/2849686/	abstract only	1 patient 61 yo male	Stage II large cell carcinoma	radiotherapy	Complete response for 7+ years
8	https://pubmed.ncbi.nlm.nih.gov/3613140/	abstract only	1 patient 63 yo male	adenocarcinoma	chemotherapy with etoposide, cisplatin, vindesine, VP-16, cyclophosphamide, adriamycin, vincristine (in various combinations)	partial response, and no sign of reccurance
9	https://pubmed.ncbi.nlm.nih.gov/1201186/	case report available	30 patients	advanced bronchogenic carcinoma who were unable to receive surgery or radiotherapy	adriamycin, 5-fluorouracil	tumor size or its metastases reduced by over 50% in 8 patients, 8 further patients experienced relief of symptoms
10	https://pubmed.ncbi.nlm.nih.gov/2448504/	Full article is in Japanese, abstract only	1 patient	large cell carcinoma of the lung with multiple intrapulmonary metastases	cisplatin-based polychemotherapy (cisplatin, adriamycin and peplomycin)	disease free for 3+ years
11	https://pubmed.ncbi.nlm.nih.gov/7354475/	abstract only	1 patient	hypertrophic osteoarthropathy (HO) secondary to unresectable large cell anaplastic carcinoma of the lung	combination chemotherapy (CAP-1)	partial remission (greater than 50% tumor regression)	treated for HO not the lung cancer itself
12	https://pubmed.ncbi.nlm.nih.gov/6580872/	case report available	1 patient, 50 yo female, history of smoking	Hypertrophic pulmonary osteoarthropathy from large cell anaplastic carcinoma	MACC (methotrexate, adriamycin, cyclophosphamide, CCNU)	marked reduction in swelling and tenderness of all involved joints	data from case report, abstract has much less info
13	https://pubmed.ncbi.nlm.nih.gov/1417018/	Full article is in Japanese, abstract only	1 patient, 62 yo male, cough for 3 years, lumbago and gait disturbance	adenocarcinoma of the lung with multiple bone metastases in rib, lumbar and pelvic bones	combined chemotherapy with epirubicin, mitomycin C, and carboplatin	lung tumor regressed in 40% of pretreated size
14	https://pubmed.ncbi.nlm.nih.gov/9340066/	Full article is in Polish, abstract only	1 patient, 62 yo male	Chylothorax with squamous cell lung cancer	treated by chemo- and radiotherapy	doing relatively well 11 years after diagnosis despite large fibrosis of right lung
15	https://pubmed.ncbi.nlm.nih.gov/8778476/	Full article is in Japanese, abstract only	1 patient 39 yo female	Seems to be primary pulmonary malignant fibrous histiocytoma (storiform-pleomorphic pattern) with lung masses	chemotherapy, left pneumonectomy	no recurrence of tumor in 20+ months
16	https://pubmed.ncbi.nlm.nih.gov/2174998/	abstract only	1 patient 68 yo male	recurrent large cell carcinoma with trophoblastic differentiation, and HCG found in tumor cells	chemotherapy (methotrexate, actinomycin D and cyclophosphamide (MAC); cisplatin, etoposide (PVP); cisplatin, adriamycin, cyclophosphamide and etoposide (PACE); 52 Gy irradiation to the chest)	partial remission, tumor regressed, 15+ months
17	https://pubmed.ncbi.nlm.nih.gov/210665/	abstract only	1 patient male	human chorionic gonadotropin (HCG)-secreting large cell carcinoma of the lung and gynecomastia	gonadotropin-releasing hormone (LHRH), chemotherapy	30 month remission
18	https://pubmed.ncbi.nlm.nih.gov/6163119/	case report available	1 patient 64 yo male history of smoking	recurrent metastatic squamous cell carcinoma	intensive combination chemotherapy (CCNU, adriamycin. nitrogen mustard, vincristine, and bleomycin followed by maintenance therapy with CCNU. nitrogen mustard and methotrexate)	6+ month remission
19	https://pubmed.ncbi.nlm.nih.gov/20926411/	supposed to be case report available--but I couldn't open it	2 patients	platinum-refractory pulmonary pleomorphic carcinoma	chemotherapy MAID (mesna, doxorubicin, ifosfamide and dacarbazine)	7 / 9 month sustained treatment effect
20	https://pubmed.ncbi.nlm.nih.gov/19861994/	case report available	1 patient 61 yo female history of dry cough (2 months)	Pulmonary spindle-cell carcinoid tumor of the lung metastatic to the mediastinal lymph nodes and liver	capecitabine, intravenous liposomal doxorubicin, octreotide	significant and long-lasting positive response	not NSCLC, they excluded it after finding small (spindle) cells in the case report
21	https://pubmed.ncbi.nlm.nih.gov/6439121/	Full article is in Japanese, abstract only	2 patients	metastatic brain tumor from lung adenocarcinoma (in one patient) and ovarian carcinoma (in the other patient)	patient with lung cancer was administered intra-arterially with CDDP, ADM and MMC	>50% reduction in metastatic lesion
22	https://pubmed.ncbi.nlm.nih.gov/7747705/	abstract only	1 patient 61 yo male	synchronous primary hepatic lymphoma and epidermoid lung carcinoma (squamous cell carcinoma)	combination chemotherapy and surgery	complete remission 40+ months
23	https://pubmed.ncbi.nlm.nih.gov/17094419/	case report available	1 patient, 65 yo male, Turkish, history of severe chronic obstructive pulmonary disease (COPD), heavy smoker	pulmonary carcinosarcoma (squamous cell carcinoma and osteosarcoma)	chemotherapy with cisplatin and doxorubicin	partial remission in both types of cancer
24	https://pubmed.ncbi.nlm.nih.gov/35265417/	abstract only	3 patients	right lung adenocarcinoma in one patient	dichloroacetate, omeprazole, ivermectin, and tamoxifen	relieved the symptoms accompanying cancer and progression.	the lung adenocarcinoma in one of the patients is determined from the pictures
25	https://pubmed.ncbi.nlm.nih.gov/32776600/	case report available	1 patient 47 yo female	Pulmonary sarcomatoid carcinoma (PSC)	camrelizumab, doxorubicin, cisplatin was introduced, followed by camrelizumab monotherapy and thrombocytopenia during the combination therapy.	partial remission 20+ months
26	https://pubmed.ncbi.nlm.nih.gov/32602108/	case report available	1 patient, 69 yo male, history of hepatocellular carcinoma and lung adenocarcinoma	therapy-related acute promyelocytic leukemia (t-APL) due to treatment of hepatocellular carcinoma and lung adenocarcinoma	all trans-retinoic acid (ATRA)	complete hematological response for APL, lung adenocarcinoma continued to progress

## Sheet: Sheet1
Number	URL	URL	Case Report state	Patient Demographics	Condition treated	Treatment	Outcome	Notes
9	9	https://pubmed.ncbi.nlm.nih.gov/1201186/	case report available	30 patients	advanced bronchogenic carcinoma who were unable to receive surgery or radiotherapy	adriamycin, 5-fluorouracil	tumor size or its metastases reduced by over 50% in 8 patients, 8 further patients experienced relief of symptoms
10	10	https://pubmed.ncbi.nlm.nih.gov/2448504/	Full article is in Japanese, abstract only	1 patient	large cell carcinoma of the lung with multiple intrapulmonary metastases	cisplatin-based polychemotherapy (cisplatin, adriamycin and peplomycin)	disease free for 3+ years
	11	https://pubmed.ncbi.nlm.nih.gov/7354475/	abstract only	1 patient	hypertrophic osteoarthropathy (HO) secondary to unresectable large cell anaplastic carcinoma of the lung	combination chemotherapy (CAP-1)	partial remission (greater than 50% tumor regression)	treated for HO not the lung cancer itself
	12	https://pubmed.ncbi.nlm.nih.gov/6580872/	case report available	1 patient, 50 yo female, history of smoking	Hypertrophic pulmonary osteoarthropathy from large cell anaplastic carcinoma	MACC (methotrexate, adriamycin, cyclophosphamide, CCNU)	marked reduction in swelling and tenderness of all involved joints	data from case report, abstract has much less info
	13	https://pubmed.ncbi.nlm.nih.gov/1417018/	Full article is in Japanese, abstract only	1 patient, 62 yo male, cough for 3 years, lumbago and gait disturbance	adenocarcinoma of the lung with multiple bone metastases in rib, lumbar and pelvic bones	combined chemotherapy with epirubicin, mitomycin C, and carboplatin	lung tumor regressed in 40% of pretreated size
	14	https://pubmed.ncbi.nlm.nih.gov/9340066/	Full article is in Polish, abstract only	1 patient, 62 yo male	Chylothorax with squamous cell lung cancer	treated by chemo- and radiotherapy	doing relatively well 11 years after diagnosis despite large fibrosis of right lung
		https://pubmed.ncbi.nlm.nih.gov/17094419/	case report available	1 patient, 65 yo male, Turkish, history of severe chronic obstructive pulmonary disease (COPD), heavy smoker	pulmonary carcinosarcoma (squamous cell carcinoma and osteosarcoma)	chemotherapy with cisplatin and doxorubicin	partial remission in both types of cancer
		https://pubmed.ncbi.nlm.nih.gov/32602108/	case report available	1 patient, 69 yo male, history of hepatocellular carcinoma and lung adenocarcinoma	therapy-related acute promyelocytic leukemia (t-APL) due to treatment of hepatocellular carcinoma and lung adenocarcinoma	all trans-retinoic acid (ATRA)	complete hematological response for APL, lung adenocarcinoma continued to progress
		https://pubmed.ncbi.nlm.nih.gov/8414933/	Full article is in Japanese, abstract only	1 patient	Hilar Lung Adenocarcinoma	superselective bronchial arterial infusion therapy with cisplatin and epirubicin hydrochloride, mitomycin C-iohexol-Lipiodol emulsion (EMILE) using Tracker -18 infusion catheter	tumor size reduced
		https://pubmed.ncbi.nlm.nih.gov/3036992/	abstract only	1 patient	Inoperable large cell lung carcinoma	combination chemotherapy	5 year survival of patient
		https://pubmed.ncbi.nlm.nih.gov/2393312/	Full article is in Japanese, abstract only	1 patient, 61 yo male	brain metastasis 6 months after the lung resection for adenocarcinoma	EAP (Etoposide, ADR, CDDP)	complete disappearance of metastases	Treated for the brain mestasis, not the cancer itself
		https://pubmed.ncbi.nlm.nih.gov/7574764/	Full article is in Japanese, abstract only	6 patients	advanced liver metastases from lung cancer (both SCLC and NSCLC)	intra-arterial infusion chemotherapy employing totally implantable vascular access with 5-FU/CDDP/EPIR/MMC/etoposide in various combinations	effective on the liver metastases	Treated for the lung mestasis, not the cancer itself
		https://pubmed.ncbi.nlm.nih.gov/17098326/	abstract only	4 patients	advanced NSCLC who were unable to receive systemic chemotherapy or radiotherapy	Arterial infusion chemotherapy	partial response
		https://pubmed.ncbi.nlm.nih.gov/9505221/	abstract only	3 patients	localized Stage I & 2 (resectable) NSCLC	neoadjuvant chemotherapy	decreases in tumor sizes
		https://pubmed.ncbi.nlm.nih.gov/2849686/	abstract only	1 patient, 61 yo male	Stage II large cell carcinoma	radiotherapy	Complete response for 7+ years
		https://pubmed.ncbi.nlm.nih.gov/3613140/	abstract only	1 patient 63 yo male	adenocarcinoma	chemotherapy with etoposide, cisplatin, vindesine, VP-16, cyclophosphamide, adriamycin, vincristine (in various combinations)	partial response, and no sign of reccurance
		https://pubmed.ncbi.nlm.nih.gov/8778476/	Full article is in Japanese, abstract only	1 patient 39 yo female	Seems to be primary pulmonary malignant fibrous histiocytoma (storiform-pleomorphic pattern) with lung masses	chemotherapy, left pneumonectomy	no recurrence of tumor in 20+ months
		https://pubmed.ncbi.nlm.nih.gov/2174998/	abstract only	1 patient 68 yo male	recurrent large cell carcinoma with trophoblastic differentiation, and HCG found in tumor cells	chemotherapy (methotrexate, actinomycin D and cyclophosphamide (MAC); cisplatin, etoposide (PVP); cisplatin, adriamycin, cyclophosphamide and etoposide (PACE); 52 Gy irradiation to the chest)	partial remission, tumor regressed, 15+ months
		https://pubmed.ncbi.nlm.nih.gov/210665/	abstract only	1 patient male	human chorionic gonadotropin (HCG)-secreting large cell carcinoma of the lung and gynecomastia	gonadotropin-releasing hormone (LHRH), chemotherapy	30 month remission
		https://pubmed.ncbi.nlm.nih.gov/6163119/	case report available	1 patient 64 yo male history of smoking	recurrent metastatic squamous cell carcinoma	intensive combination chemotherapy (CCNU, adriamycin. nitrogen mustard, vincristine, and bleomycin followed by maintenance therapy with CCNU. nitrogen mustard and methotrexate)	6+ month remission
		https://pubmed.ncbi.nlm.nih.gov/20926411/	supposed to be case report available--but I couldn't open it	2 patients	platinum-refractory pulmonary pleomorphic carcinoma	chemotherapy MAID (mesna, doxorubicin, ifosfamide and dacarbazine)	7 / 9 month sustained treatment effect
		https://pubmed.ncbi.nlm.nih.gov/19861994/	case report available	1 patient 61 yo female history of dry cough (2 months)	Pulmonary spindle-cell carcinoid tumor of the lung metastatic to the mediastinal lymph nodes and liver	capecitabine, intravenous liposomal doxorubicin, octreotide	significant and long-lasting positive response	not NSCLC, they excluded it after finding small (spindle) cells in the case report
		https://pubmed.ncbi.nlm.nih.gov/6439121/	Full article is in Japanese, abstract only	2 patients	metastatic brain tumor from lung adenocarcinoma (in one patient) and ovarian carcinoma (in the other patient)	patient with lung cancer was administered intra-arterially with CDDP, ADM and MMC	>50% reduction in metastatic lesion
		https://pubmed.ncbi.nlm.nih.gov/7747705/	abstract only	1 patient 61 yo male	synchronous primary hepatic lymphoma and epidermoid lung carcinoma (squamous cell carcinoma)	combination chemotherapy and surgery	complete remission 40+ months
		https://pubmed.ncbi.nlm.nih.gov/32776600/	case report available	1 patient 47 yo female	Pulmonary sarcomatoid carcinoma (PSC)	camrelizumab, doxorubicin, cisplatin was introduced, followed by camrelizumab monotherapy and thrombocytopenia during the combination therapy.	partial remission 20+ months
		https://pubmed.ncbi.nlm.nih.gov/35265417/	abstract only	3 patients	right lung adenocarcinoma in one patient (from picture captions)	dichloroacetate, omeprazole, ivermectin, and tamoxifen	relieved the symptoms accompanying cancer and progression.	the lung adenocarcinoma in one of the patients is determined from the pictures

## Sheet: summary issues
question 1
history and current condition almost always seem swapped
doesn't state number of patients
question 2
it's not giving a summary of the case report at all, it's just telling the intended purpose of the paper, but not anyting about what happened
misc.
no therapeutics are mentioned
